# Supplementary material for: Role of Volatile Organic Compounds Produced by Kosakonia cowanii Cp1 during Competitive Colonization Interaction against Pectobacterium aroidearum SM2
Source: MDPI journal article supplement (doi:10.3390/microorganisms12050930), 2024-05-03
Supplement: s1 [file s1]

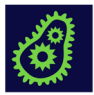

Supplementary Results

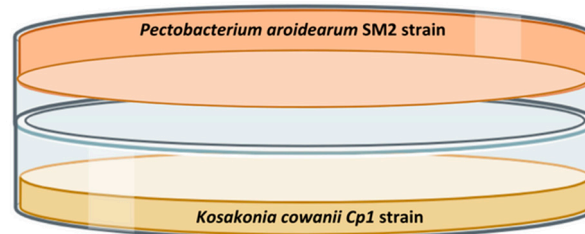

**Figure S1.** Two-compartment Petri dish plate device. On the bottom side of device *K. cowanii* Cp1 was inoculated on TSA medium and grown to produce any VOCs. *P. aroidearum* SM2 was inoculated on TSA medium (upper side) to evaluate colony growth inhibition.

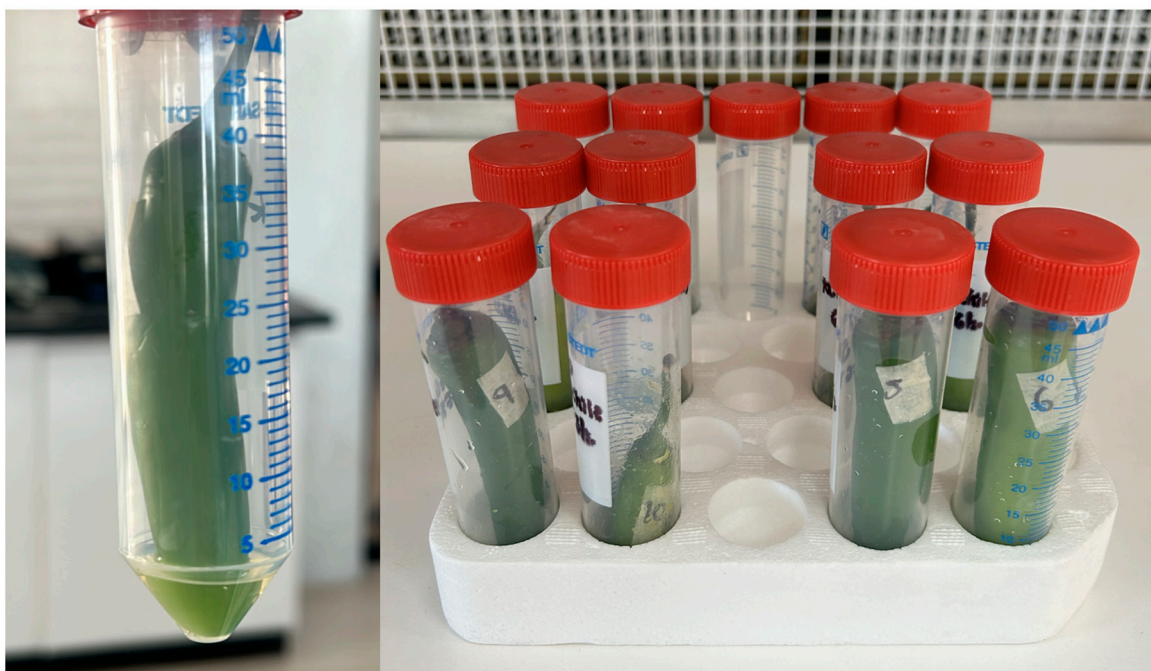

**Figure S2.** Pathogenic inhibition assays using cell-free filtrate on chili fruits.

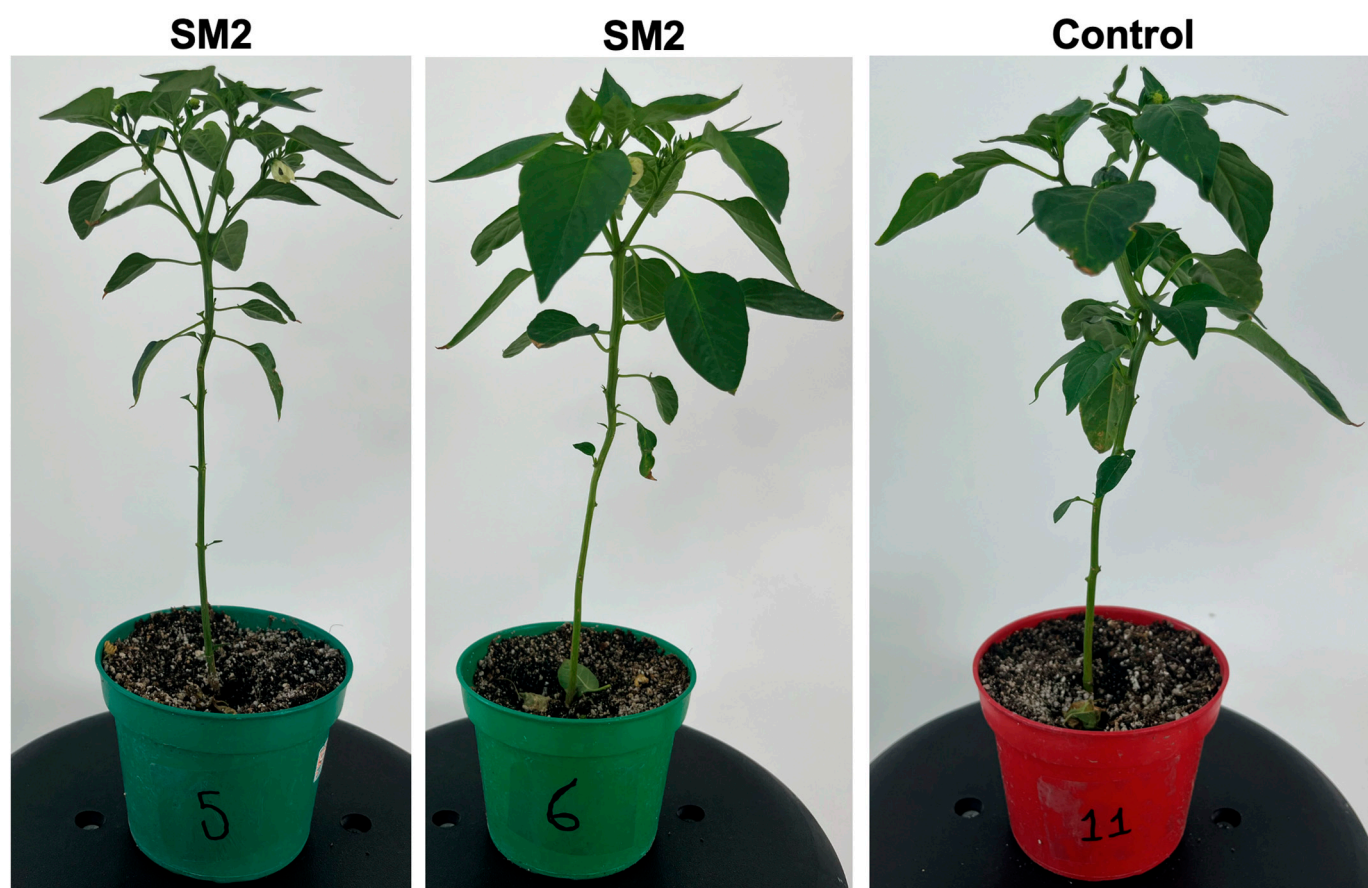

**Figure S3.** Infection test of SM2 isolates on leaves of chili plants.

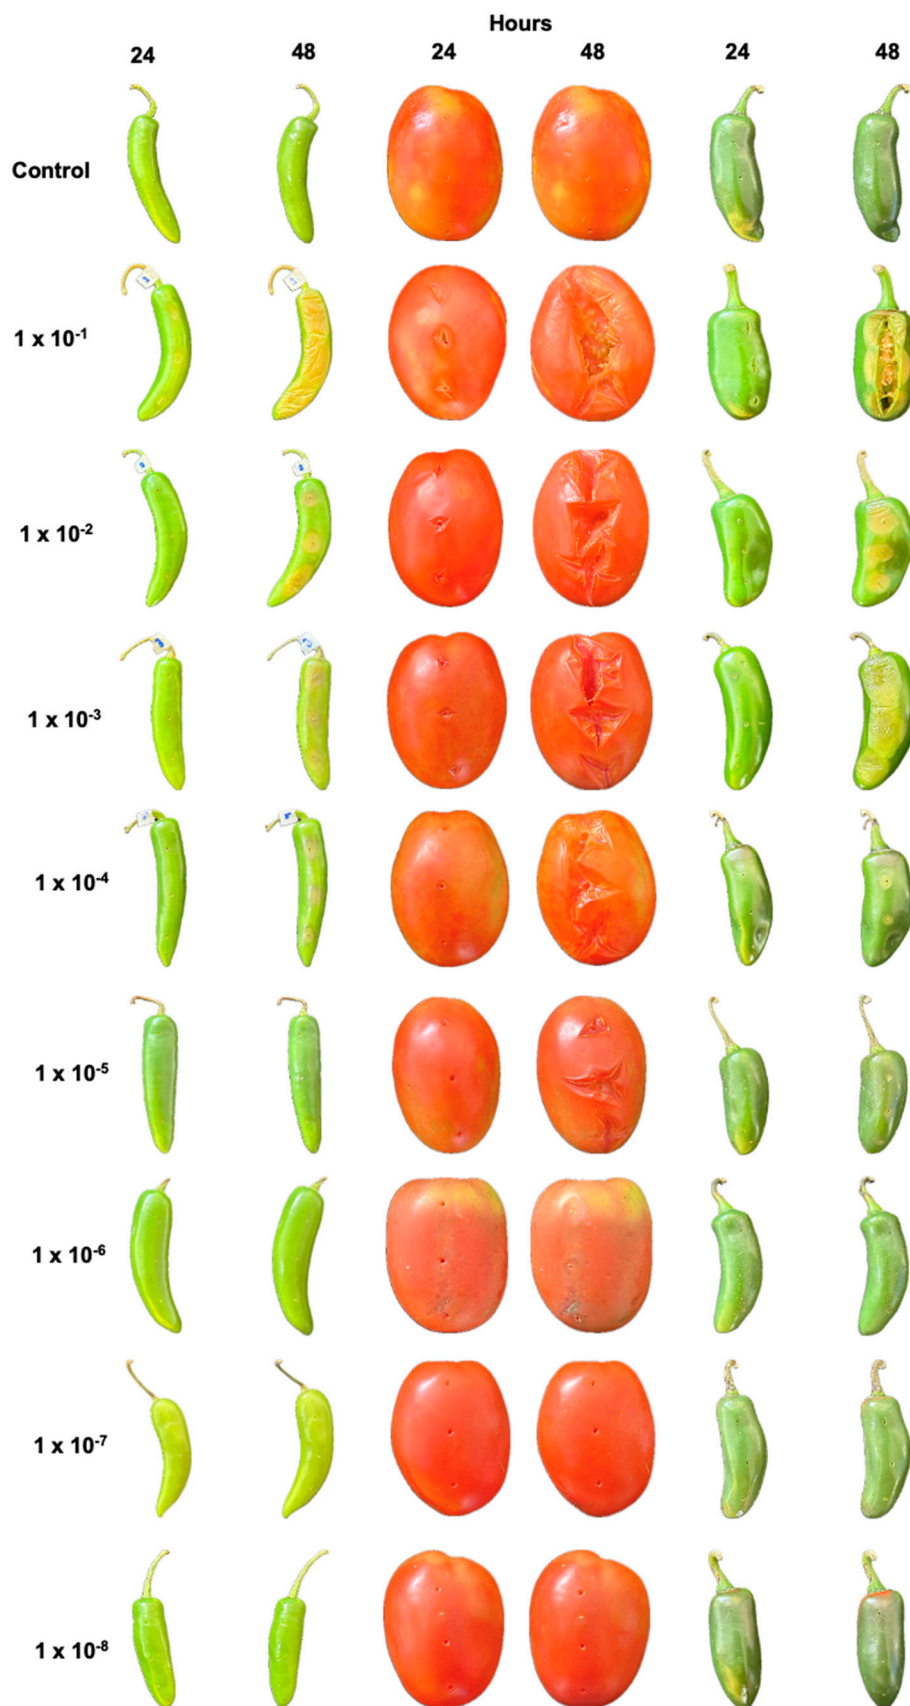

**Figure S4.** Minimum inoculum of *P. aroidearum* SM2 causing soft rot symptoms. Serial dilutions were made in 0.1% peptone and 10  $\mu$ L bacterial suspensions were inoculated in each of the wounds, which were then incubated and evaluated for 48 hours.

**Table S1.** Pairwise comparison of Average Nucleotide Identity (ANI) for *Pectobacterium* species. ANI values  $\geq$  95% are colored red.

| ANI VALUES $\geq$ 95%  | <i>P. aroidearum</i> SM2 | <i>P. aroidearum</i> L6 | <i>P. aroidearum</i> QJ002 | <i>P. actinidiae</i> KKH3 | <i>P. aquaticum</i> A212-S19-A16 | <i>P. atrosepitum</i> NCPPB 549 | <i>P. betavascularum</i> NCPPB 2795 | <i>P. brasiliense</i> LMG 21371 | <i>P. carotovorum</i> DSM 30168 | <i>P. colocasium</i> LJ1 | <i>P. fontis</i> M022 | <i>P. jejuense</i> 13-115 | <i>P. odoriferum</i> NCPPB 3839 | <i>P. parmentieri</i> RNS 08-42-1A | <i>P. parvum</i> s0421 | <i>P. peruvienne</i> IFB5232 | <i>P. polaris</i> NIBIO1006 | <i>P. polonicum</i> DPMP315 | <i>P. punjabense</i> SS95 |
|---------------------------------------------------------------------------------------------------------|--------------------------|-------------------------|----------------------------|---------------------------|----------------------------------|---------------------------------|-------------------------------------|---------------------------------|---------------------------------|--------------------------|-----------------------|---------------------------|---------------------------------|------------------------------------|------------------------|------------------------------|-----------------------------|-----------------------------|---------------------------|
| <i>P. aroidearum</i> SM2                                                                                |                          | 97.30                   | 97.25                      | 89.21                     | 89.34                            | 88.29                           | 88.29                               | 90.18                           | 89.93                           | 90.56                    | 87.48                 | 92.79                     | 92.99                           | 88.28                              | 92.92                  | 88.21                        | 93.20                       | 89.34                       | 88.55                     |
| <i>P. aroidearum</i> L6                                                                                 | 97.16                    |                         | 97.81                      | 89.22                     | 89.45                            | 88.44                           | 88.39                               | 90.21                           | 89.79                           | 90.55                    | 87.44                 | 90.14                     | 89.46                           | 88.01                              | 88.66                  | 88.60                        | 89.88                       | 88.51                       | 88.44                     |
| <i>P. aroidearum</i> QJ002                                                                              | 97.26                    | 97.98                   |                            | 89.25                     | 89.58                            | 88.59                           | 88.29                               | 90.25                           | 89.93                           | 90.56                    | 87.47                 | 90.31                     | 89.58                           | 88.01                              | 89.74                  | 88.66                        | 89.92                       | 88.53                       | 88.48                     |
| <i>P. actinidiae</i> KKH3                                                                               | 88.96                    | 89.10                   | 88.98                      |                           | 91.18                            | 88.57                           | 88.15                               | 90.72                           | 92.55                           | 89.23                    | 87.62                 | 91.07                     | 92.01                           | 87.63                              | 90.86                  | 88.58                        | 91.02                       | 88.67                       | 87.79                     |
| <i>P. aquaticum</i> A212-S19-A16                                                                        | 89.52                    | 88.56                   | 89.70                      | 91.58                     |                                  | 89.04                           | 88.77                               | 92.80                           | 93.67                           | 89.48                    | 87.79                 | 92.79                     | 92.99                           | 88.28                              | 92.92                  | 89.21                        | 93.20                       | 89.34                       | 88.55                     |
| <i>P. atrosepitum</i> NCPPB 549                                                                         | 88.39                    | 88.56                   | 88.58                      | 88.76                     | 89.00                            |                                 | 91.25                               | 89.23                           | 89.36                           | 88.07                    | 87.19                 | 89.18                     | 88.91                           | 89.46                              | 89.27                  | 93.59                        | 89.42                       | 89.19                       | 89.12                     |
| <i>P. betavascularum</i> NCPPB 2795                                                                     | 88.40                    | 88.50                   | 88.32                      | 88.35                     | 88.74                            | 91.39                           |                                     | 88.73                           | 88.97                           | 87.79                    | 86.85                 | 88.90                     | 88.54                           | 88.53                              | 88.86                  | 91.69                        | 89.07                       | 88.67                       | 88.64                     |
| <i>P. brasiliense</i> LMG 21371                                                                         | 90.05                    | 90.27                   | 90.18                      | 90.89                     | 92.54                            | 89.11                           | 88.54                               |                                 | 92.68                           | 89.67                    | 87.58                 | 94.17                     | 91.34                           | 88.32                              | 93.08                  | 89.15                        | 93.46                       | 88.91                       | 88.67                     |
| <i>P. carotovorum</i> DSM 30168                                                                         | 89.88                    | 89.87                   | 89.80                      | 92.70                     | 93.47                            | 89.28                           | 88.81                               | 92.77                           |                                 | 89.85                    | 87.83                 | 93.30                     | 94.81                           | 88.30                              | 92.87                  | 89.39                        | 93.10                       | 89.84                       | 88.60                     |
| <i>P. colocasium</i> LJ1                                                                                | 90.48                    | 90.58                   | 90.53                      | 89.32                     | 89.38                            | 87.99                           | 87.56                               | 89.71                           | 89.83                           |                          | 87.50                 | 89.92                     | 89.44                           | 87.42                              | 89.51                  | 87.97                        | 89.70                       | 88.15                       | 87.63                     |
| <i>P. fontis</i> M022                                                                                   | 87.60                    | 87.69                   | 87.66                      | 87.97                     | 87.76                            | 87.27                           | 86.91                               | 87.75                           | 88.09                           | 87.76                    |                       | 87.98                     | 88.02                           | 86.64                              | 87.94                  | 87.30                        | 87.89                       | 87.34                       | 86.79                     |
| <i>P. jejuense</i> 13-115                                                                               | 89.98                    | 90.17                   | 90.18                      | 91.16                     | 92.45                            | 88.92                           | 88.70                               | 94.02                           | 93.20                           | 89.88                    | 87.68                 |                           | 91.95                           | 88.24                              | 93.82                  | 89.03                        | 94.63                       | 89.14                       | 88.40                     |
| <i>P. odoriferum</i> NCPPB 3839                                                                         | 89.34                    | 89.49                   | 89.45                      | 92.26                     | 92.74                            | 89.03                           | 88.65                               | 91.61                           | 94.68                           | 89.46                    | 87.88                 | 92.21                     |                                 | 88.04                              | 92.31                  | 89.16                        | 92.32                       | 89.59                       | 88.47                     |
| <i>P. parmentieri</i> RNS 08-42-1A                                                                      | 87.76                    | 88.03                   | 87.94                      | 87.84                     | 88.10                            | 89.40                           | 88.53                               | 88.29                           | 88.33                           | 87.44                    | 86.48                 | 88.23                     | 88.13                           |                                    | 88.32                  | 89.49                        | 88.36                       | 90.60                       | 91.06                     |
| <i>P. parvum</i> s0421                                                                                  | 89.81                    | 88.89                   | 89.87                      | 91.25                     | 92.93                            | 89.33                           | 88.77                               | 93.19                           | 93.01                           | 89.67                    | 87.91                 | 94.04                     | 92.53                           | 88.52                              |                        | 89.38                        | 95.92                       | 89.29                       | 88.71                     |
| <i>P. peruvienne</i> IFB5232                                                                            | 88.35                    | 88.61                   | 88.59                      | 88.67                     | 89.05                            | 93.55                           | 91.51                               | 89.08                           | 89.29                           | 88.03                    | 87.01                 | 89.13                     | 89.13                           | 89.44                              | 89.17                  |                              | 89.24                       | 89.16                       | 89.20                     |
| <i>P. polaris</i> NIBIO1006                                                                             | 89.92                    | 89.86                   | 89.91                      | 91.29                     | 93.06                            | 89.34                           | 88.98                               | 93.57                           | 93.20                           | 89.82                    | 87.71                 | 94.73                     | 92.46                           | 88.34                              | 95.70                  | 89.34                        |                             | 89.20                       | 88.71                     |
| <i>P. polonicum</i> DPMP315                                                                             | 88.27                    | 88.47                   | 88.42                      | 88.83                     | 89.09                            | 89.13                           | 88.49                               | 88.91                           | 89.88                           | 88.12                    | 87.06                 | 89.11                     | 89.58                           | 90.63                              | 89.00                  | 89.20                        | 89.12                       |                             | 93.54                     |
| <i>P. punjabense</i> SS95                                                                               | 88.32                    | 88.43                   | 88.37                      | 87.94                     | 88.33                            | 89.11                           | 88.50                               | 88.70                           | 88.62                           | 87.60                    | 86.62                 | 88.44                     | 88.39                           | 91.03                              | 88.46                  | 89.20                        | 88.66                       | 93.51                       |                           |

**Table S2.** Identification of VOCs produced by *K. cowanii* Cp1 at 2 h by HS-SPME-GC-MS.

| Compounds                                          | Retention Time (min) | Relative Peak Area (%) | Chemical Classes        | Compounds                                                                                   | Retention Time (min) | Relative Peak Area (%) | Chemical Classes        |
|----------------------------------------------------|----------------------|------------------------|-------------------------|---------------------------------------------------------------------------------------------|----------------------|------------------------|-------------------------|
| Carbon dioxide                                     | 4.219                | 1.23                   | Hydrocarbon             | Piconol                                                                                     | 44.999               | 0.09                   | Other compounds         |
| Semicarbazide                                      | 4.467                | 0.5                    | Amide                   | 2-Butyl-3-methylpyrazine                                                                    | 45.26                | 0.08                   | Pyrazines               |
| n-Hexane                                           | 4.578                | 0.28                   | Hydrocarbon             | Benzeneacetaldehyde                                                                         | 45.728               | 0.52                   | Aldehydes               |
| Ethyl ether                                        | 4.636                | 0.88                   | Ether                   | 2-Acetylthiazole                                                                            | 45.911               | 0.36                   | Ketones                 |
| Methanethiol                                       | 4.895                | 0.53                   | Tioles                  | Acetophenone                                                                                | 46.062               | 0.48                   | Ketones                 |
| Heptane                                            | 5.093                | 1.82                   | Hydrocarbons            | 2-Furanmethanol                                                                             | 46.38                | 1                      | Aromatic compounds      |
| Acetone                                            | 6.39                 | 0.94                   | Ketones                 | Pyrazine, 2-butyl-3,5-dimethyl-                                                             | 46.729               | 0.62                   | Pyrazine                |
| Cyclotrisiloxane, hexamethyl-                      | 7.435                | 2.79                   | Organosilicos compounds | 1,3-Oxathiolane, 2-methyl-2-phenyl-                                                         | 47.133               | 0.08                   | Esters                  |
| 2-Propanone, hydrazone                             | 7.793                | 1.14                   | Ketone                  | Benzaldehyde, 2-hydroxy-                                                                    | 47.757               | 0.16                   | Aldehydes               |
| 2-Butanone                                         | 8.539                | 1.15                   | Ketone                  | 4-Carene, (1S,3S,6R)-(-)-                                                                   | 48.514               | 0.04                   | Hydrocarbons            |
| Butanal, 2-methyl-                                 | 9.059                | 0.42                   | Aldehyde                | Silane, diethyldi(3-phenylpropoxy)-                                                         | 48.82                | 0.05                   | Other compounds         |
| Butanal, 3-methyl-                                 | 9.25                 | 2.5                    | Aldehyde                | 3,4-Dihydro-1-methylpyrrolo[1,2-alpyrazine                                                  | 49.067               | 0.12                   | Pyrazine                |
| Ethanol                                            | 9.83                 | 0.04                   | Alcohol                 | 2-Furanmethanol, 5-methyl-                                                                  | 49.611               | 0.06                   | Alcohols                |
| 2,3-Butanedione                                    | 12.5                 | 0.48                   | Ketone                  | Tridecanal                                                                                  | 50.032               | 0.49                   | Aldehyde                |
| Trichloroethylene                                  | 13.038               | 0.33                   | Hydrocarbons            | Cyclopenten-4-one, 1,2,3,3-tetramethyl-                                                     | 51.604               | 1                      | Hydrocarbons            |
| Acetonitrile                                       | 13.59                | 0.03                   | Other compounds         | R-Palmitoyl-(1-methyl)ethanolamide                                                          | 51.851               | 0.04                   | Amide                   |
| Methyl Isobutyl Ketone                             | 13.708               | 0.05                   | Ketone                  | Cyclopropane, octyl-                                                                        | 52.556               | 0.26                   | Hydrocarbons            |
| Cyclotetrasiloxane, octamethyl-                    | 14.283               | 2.51                   | Organosilicos compounds | 7-Chloro-2,3-dihydro-3-(4-N,N-dimethylaminobenzylidene)-5-phenyl-1H-1,4-benzodiazepin-2-one | 55.995               | 0.09                   | Other compounds         |
| Trichloromethane                                   | 14.768               | 0.51                   | Other compounds         | 2-Tridecanone                                                                               | 56.873               | 0.19                   | Ketones                 |
| Ethyl 3-amino-4-(1,3-benzodiazol-1-yl)benzoate     | 15.131               | 0.13                   | Esther                  | Cyclodecene                                                                                 | 58.078               | 0.05                   | Alkenes                 |
| Toluene                                            | 15.417               | 0.14                   | Hydrocarbons            | Cyclononasiloxane, octadecamethyl-                                                          | 58.314               | 0.24                   | Organosilicos compounds |
| Disulfide, dimethyl                                | 17.138               | 0.42                   | Other compounds         | Cinnoline, 3-methyl-                                                                        | 59.162               | 0.08                   | Aromatic compounds      |
| N-(4-Methylbenzenesulfonyl)-2-methylazetidin-3-one | 17.749               | 0.12                   | Ketones                 | Benzyl alcohol                                                                              | 60.946               | 1.02                   | Alcohols                |
| Hexanal                                            | 18.077               | 0.14                   | Aldehydes               | Butanoic acid, butyl ester                                                                  | 61.691               | 0.37                   | Acids                   |
| 1,2-Dichloroethyl hydroperoxide                    | 18.231               | 0.02                   | Esthers                 | 2,2,4-Trimethyl-1,3-pentanediol diisobutyrate                                               | 62.951               | 0.15                   | Alcohols                |
| 8-Nonynoic acid                                    | 18.342               | 0.1                    | Acids                   | n-Decanoic acid                                                                             | 63.669               | 0.22                   | Acids                   |
| 2-Butenal, 2-methyl-, (E)-                         | 18.669               | 0.33                   | Aldehydes               | Benzenepentanamide                                                                          | 64.029               | 0.09                   | Acids                   |
| Acetic acid, chloro-                               | 18.973               | 0.08                   | Acids                   | Phenylethyl Alcohol                                                                         | 64.415               | 0.07                   | Alcohols                |
| o-Xylene                                           | 20.23                | 0.04                   | Hydrocarbons            | Diethylmalonic acid, 2,2,3,3,4,4,4-heptafluorobutyl hexyl ester                             | 64.76                | 0.16                   | Esters                  |
| p-Xylene                                           | 20.739               | 0.14                   | Hydrocarbons            | Benzene, 1-isocyano-2-methyl-                                                               | 65.925               | 0.04                   | Other compounds         |
| 3-Penten-2-one, 4-methyl-                          | 21.039               | 0.29                   | Ketones                 | 2-Butanone, 1,1-dichloro-3,3-dimethyl-                                                      | 67.385               | 0.09                   | Ketones                 |
| 1-Butanol                                          | 22.042               | 0.28                   | Alcohols                | S-Methyl 3-methylbutanethioate                                                              | 69.092               | 0.11                   | Esters                  |
| Nonane                                             | 22.549               | 0.05                   | Hydrocarbons            | Ethanone, 1-(1H-pyrrol-2-yl)-                                                               | 69.372               | 0.04                   | Ketones                 |
| Pyridine                                           | 23.463               | 0.03                   | Aromatic compounds      | Cyclododecane                                                                               | 70.558               | 13.44                  | Hydrocarbons            |



|                                                    |        |       |                             |                                                                                  |        |      |                            |
|----------------------------------------------------|--------|-------|-----------------------------|----------------------------------------------------------------------------------|--------|------|----------------------------|
| Cyclopentasiloxane, decamethyl-                    | 23.812 | 0.6   | Organosilico<br>s compounds | Trimethylsilyl [2-(4-chlorophenyl)-<br>4-phenyl-1,3-thiazol-5-yl]acetate         | 71.595 | 0.22 | Other<br>compounds         |
| Cyclopentasiloxane, decamethyl-                    | 23.904 | 1.15  | Organosilico<br>s compounds | 2-Pyrrolidinone                                                                  | 71.854 | 0.18 | Other<br>compounds         |
| 2-Butenal, 3-methyl-                               | 24.775 | 0.1   | Aldehydes                   | Phenol                                                                           | 72.061 | 0.36 | Aromatics<br>compounds     |
| D-Limonene                                         | 25.187 | 0.07  | Hydrocarbon<br>s            | 1,2,3,4-Tetrahydrofluorene                                                       | 72.378 | 0.15 | Hydrocarbons               |
| Pyrazine                                           | 25.358 | 2.34  | Pyrazines                   | Heptanoic acid                                                                   | 72.635 | 0.14 | Acids                      |
| Phthalic acid, 2-(2-nitrophenyl)ethyl nonyl ester  | 25.755 | 0.04  | Esters                      | Propane, 1-isothiocyanato-                                                       | 72.697 | 0.17 | Other<br>compounds         |
| Thiazole                                           | 27.312 | 0.07  | Other<br>compounds          | 1H,1H,2H,2H-Perfluorooctan-1-ol                                                  | 72.889 | 0.22 | Alcohols                   |
| Aziridine, 1-(2-phenylethyl)-                      | 27.898 | 0.07  | Other<br>compounds          | Cyclodecasiloxane, eicosamethyl-                                                 | 73.228 | 0.28 | Organosilicos<br>compounds |
| Pyrazine, methyl-                                  | 28.213 | 2.17  | Pyrazines                   | 2-Propenal, 3-phenyl-                                                            | 73.559 | 0.16 | Aldehydes                  |
| Ethanone, 1-cyclopentyl-                           | 28.781 | 0.03  | Ketones                     | 2-Pentadecanone                                                                  | 74.507 | 0.23 | Ketones                    |
| Acetic acid, methoxy-, ethyl ester                 | 29.631 | 0.11  | Esters                      | Cyclohexanol, 5-methyl-2-(1-methylethyl)-,<br>(1.alpha.,2.alpha.,5.alpha.)-      | 75.73  | 0.15 | Alcohols                   |
| Octanal                                            | 29.991 | 0.07  | Aldehydes                   | 5-Methyl-2-phenyl-2-hexenal                                                      | 76.243 | 0.3  | Aldehydes                  |
| Carbonofluoridic acid, trifluoromethyl ester       | 30.094 | 0.05  | Esters                      | p-Cresol                                                                         | 76.565 | 0.04 | Aromatic<br>compounds      |
| 2-Propanone, 1-hydroxy-                            | 30.339 | 0.41  | Ketones                     | 2-Piperidinone                                                                   | 76.809 | 0.03 | Other<br>compounds         |
| Pyrazine, 2,5-dimethyl-                            | 31.125 | 19.06 | Pyrazines                   | 3-tert-Butyl-4-hydroxyanisole, acetate                                           | 78.349 | 0.05 | Aromatic<br>compounds      |
| Pyrazine, 2,6-dimethyl-                            | 31.442 | 0.7   | Pyrazines                   | Octanoic acid                                                                    | 78.625 | 1.14 | Acids                      |
| Pyrazine, ethyl-                                   | 31.781 | 0.13  | Pyrazines                   | As-indacen-3-one, 1,1,8b-trimethyl-<br>1,4,5,8b-tetrahydro-2-oxa-3a,7,8a-triaza- | 79.345 | 0.04 | Other<br>compounds         |
| Cyclohexasiloxane, dodecamethyl-                   | 32.252 | 0.82  | Organosilico<br>s compounds | Valeric acid, 2,4,6-trichlorophenyl ester                                        | 79.524 | 0.08 | Esters                     |
| Pentanoic acid, 4-methyl-, ethyl ester             | 32.574 | 0.13  | Esters                      | 4-Methylphenol, isopropyl ether                                                  | 79.787 | 0.09 | Ethers                     |
| Hexyl chloroformate                                | 32.845 | 0.07  | Other<br>compounds          | 2,6-Dihydroxybenzoic acid, 3TMS derivative                                       | 80.568 | 0.17 | Acids                      |
| (Dimethylaminomethylene)malononitrile              | 33.265 | 0.04  | Other<br>compounds          | 2H-Pyran-2-one, 6-pentyl-                                                        | 80.936 | 0.12 | Esters                     |
| n-Propyl t-butyl ether                             | 33.338 | 0.06  | Ethers                      | 1H-Imidazole, 2-methyl-                                                          | 81.376 | 0.05 | Other<br>compounds         |
| Dimethyl trisulfide                                | 33.973 | 0.18  | Other<br>compounds          | Cyclododecane                                                                    | 81.927 | 0.09 | Hydrocarbons               |
| Pyrazine, 2-ethyl-6-methyl-                        | 34.329 | 0.11  | Pyrazines                   | 5.alpha.-Androstan-1-methylene-<br>3.alpha.-ol-17-one, di-trimethylsilyl         | 82.194 | 0.04 | Other<br>compounds         |
| Pyrazine, 2-ethyl-5-methyl-                        | 34.599 | 1.44  | Pyrazines                   | 5-Acetyl-2-methylpyridine                                                        | 82.511 | 0.05 | Other<br>compounds         |
| Benzenamine, N,N,2-trimethyl-                      | 34.85  | 0.05  | Amines                      | Cyclononasiloxane, octadecamethyl-                                               | 82.936 | 0.13 | Organosilicos<br>compounds |
| 2-Nonanone                                         | 34.963 | 0.15  | Ketones                     | Ethanone, 1-(4-ethylphenyl)-                                                     | 83.089 | 0.14 | Ketones                    |
| Pyrazine, trimethyl-                               | 35.122 | 1.83  | Pyrazines                   | Methyl anthranilate                                                              | 83.531 | 3.22 | Esters                     |
| Pyrazine, 2-methyl-5-(1-methylethyl)-              | 35.671 | 0.34  | Pyrazines                   | Methanone, (7-bromo-2,3-dihydro-<br>1,4-benzodioxin-6-yl)2-thienyl-              | 84.279 | 0.09 | Ketones                    |
| Pyridine, 2-(1-methylethyl)-                       | 36.659 | 0.12  | Pyrazines                   | Benzamide                                                                        | 84.559 | 0.38 | Amides                     |
| Pyrazine, 3-ethyl-2,5-dimethyl-                    | 37.156 | 1.44  | Pyrazines                   | Sorbic Acid                                                                      | 85.086 | 0.18 | Acids                      |
| Isobutyl 4-methylpentan-2-yl carbonate             | 37.429 | 0.13  | Other<br>compounds          | 1-(4-Nitrophenyl)pyrazole-4-carboxylic acid                                      | 85.229 | 0.13 | Acids                      |
| Methional                                          | 37.536 | 0.18  | Hydrocarbon<br>s            | Ethanol, 2,2-dichloro-                                                           | 85.364 | 0.13 | Alcohols                   |
| Isobutyl 2,5,8,11-tetraoxatridecan-13-yl carbonate | 37.757 | 0.07  | Other<br>compounds          | Benzonitrile, 2-hydroxy-                                                         | 85.509 | 0.35 | Other<br>compounds         |

|                                                                     |        |      |                 |                                                                                                                   |        |      |                         |
|---------------------------------------------------------------------|--------|------|-----------------|-------------------------------------------------------------------------------------------------------------------|--------|------|-------------------------|
| Pyrazine, 2-ethyl-3,5-dimethyl-                                     | 37.891 | 0.1  | Pyrazines       | Ethyl 5-methyl-1,3,4-oxadiazole-2-carboxylate                                                                     | 85.794 | 0.16 | Aromatic compounds      |
| Furfural                                                            | 38.001 | 0.27 | Other compounds | Cyclononasiloxane, octadecamethyl-                                                                                | 85.903 | 0.46 | Organosilicos compounds |
| .alpha.-Terpineol                                                   | 38.402 | 0.04 | Other compounds | Sebacic acid, 2-hexyl isobutyl ester                                                                              | 86.487 | 0.3  | Esters                  |
| 4-Heptanol, 2,6-dimethyl-                                           | 38.586 | 0.16 | Alcohols        | Benzenemethanol, 2-hydroxy-5-methyl-                                                                              | 86.725 | 0.25 | Alcohols                |
| Pyrazine, 2-ethenyl-6-methyl-                                       | 39.055 | 0.09 | Pyrazines       | 2,4-Di-tert-butylphenol                                                                                           | 87.026 | 0.39 | Aromatic compounds      |
| 1-Hexanol, 2-ethyl-                                                 | 39.232 | 0.77 | Alcohols        | n-Decanoic acid                                                                                                   | 88.039 | 0.9  | Acids                   |
| Cycloheptasiloxane, tetradecamethyl-                                | 39.517 | 0.49 | Alcohols        | Diethyl Phthalate                                                                                                 | 88.843 | 0.15 | Esters                  |
| Ethanone, 1-(2-furanyl)-                                            | 39.815 | 0.09 | Ketones         | 3-Chloro-6-methyl-6,7-dihydro-9H-5-oxa-9-azabenzocyclohepten-8-one                                                | 89.48  | 0.08 | Other compounds         |
| 2H-Pyran-2,5-diol, tetrahydro-, diacetate                           | 40.06  | 0.07 | Other compounds | 1,3-Dioxolane, 4-ethyl-5-octyl-2,2-bis(trifluoromethyl)-, trans-                                                  | 90.02  | 0.02 | Other compounds         |
| 3-Phenylindole                                                      | 40.21  | 0.41 | Other compounds | Phenol, 4-(1,1-dimethylpropyl)-                                                                                   | 90.378 | 0.04 | Aromatic compounds      |
| Benzaldehyde                                                        | 40.596 | 5.38 | Aldehydes       | Tetracosamethyl-cyclododecasiloxane                                                                               | 91.188 | 0.02 | Other compounds         |
| 2,4,4,6,6,8,8-heptamethyl-1,3,5,7,2,4,6,8-tetraoxatetrasilocan-2-ol | 40.927 | 0.5  | Other compounds | Benzene, 1-chloro-4-[2-nitro-1-(2-propenylthio)ethyl]-                                                            | 92.854 | 0.05 | Other compounds         |
| Pyrazine, 2-methyl-3-(2-propenyl)-                                  | 41.242 | 0.6  | Pyrazines       | S-Methyl isopropylphosphonamidothioate                                                                            | 93.447 | 0    | Other compounds         |
| benzenamine, 3-[(tetrahydro-2H-pyran-2-yl)oxy]-                     | 41.472 | 0.09 | Other compounds | 2-Methoxyethoxy-ethanol                                                                                           | 93.647 | 0.01 | Aromatic compounds      |
| 1-Octanol                                                           | 42.082 | 0.18 | Alcohols        | 3,5-di-tert-Butyl-4-hydroxybenzaldehyde                                                                           | 93.877 | 0.16 | Aldehydes               |
| Fluoren-9-ol, 3,6-dimethoxy-9-(2-phenylethynyl)-                    | 42.628 | 0.24 | Other compounds | 4-Nitrophenyl trifluoromethanesulfonate                                                                           | 94.247 | 0    | Aromatic compound       |
| Phosphonoacetic Acid, 3TMS derivative                               | 42.907 | 0.29 | Acids           | 2-Trifluoromethylbenzoic acid, 4-methylpentyl ester                                                               | 95.251 | 0.04 | Esters                  |
| Pyrazine, 2-(n-propyl)-                                             | 43.167 | 0.17 | Pyrazines       | Cyclodecasiloxane, eicosamethyl-                                                                                  | 95.392 | 0.03 | Organosilicos compounds |
| Phosphonoacetic Acid, 3TMS derivative                               | 43.547 | 0.14 | Acids           | 6-Amino-2-(fluoromethylidene)-3-(2-methylphenyl)-2,3-dihydroquinazolin-4(1H)-one, mono(trimethylsilyl) derivative | 95.481 | 0.03 | Other compounds         |
| Benzonitrile                                                        | 44.114 | 0.05 | Benzens         | 4-Hydroxy-2-methoxybenaldehyde                                                                                    | 95.624 | 0.04 | Aromatic compounds      |
| 2-Undecanone                                                        | 44.293 | 0.21 | Hydrocarbons    | n-Hexadecanoic acid                                                                                               | 95.865 | 0.15 | Acids                   |
| Androsta-1,4-dien-3-one, 17-[(1-oxo-10-undecenyl)oxy]-, (17.beta.)- | 44.413 | 0.07 | Other compounds | Chloromethanesulfonyl chloride                                                                                    | 96.396 | 0.01 | Other compounds         |
| Ethanol, 2-(2-ethoxyethoxy)-                                        | 44.529 | 0.11 | Alcohols        | Benzoic acid                                                                                                      | 96.755 | 0.03 | Other compounds         |
|                                                                     |        |      |                 | Phthalimide                                                                                                       | 97.679 | 0.14 | Amide                   |

**Table S3.** Identification of VOCs produced by *K. cowanii* Cp1 at 4 h by HS-SPME-GC-MS.

| Compounds                                                         | Retention Time (min) | Relative Peak Area (%) | Chemical Classes | Compounds                                                                                     | Retention Time (min) | Relative Peak Area (%) | Chemical Classes        |
|-------------------------------------------------------------------|----------------------|------------------------|------------------|-----------------------------------------------------------------------------------------------|----------------------|------------------------|-------------------------|
| Carbon dioxide                                                    | 4.2126               | 1.5782                 | Hydrocarbons     | Silane, dimethyl(dimethyl(dimethyl(2-isopropylphenoxy)silyloxy)silyloxy)(2-isopropylphenoxy)- | 42.9053              | 0.3848                 | Organosilicos compounds |
| 2-Octanamine                                                      | 4.3659               | 1.7024                 | Amines           | 2-Isoamylpyrazine                                                                             | 43.1543              | 0.3359                 | Pyrazines               |
| Ethyl ether                                                       | 4.6355               | 1.0973                 | Ethers           | Phosphonoacetic Acid, 3TMS derivative                                                         | 43.5387              | 0.1748                 | Acids                   |
| Methanethiol                                                      | 4.8934               | 0.6788                 | Tioles           | 2-Undecanone                                                                                  | 44.2764              | 0.4162                 | Ketones                 |
| Heptane                                                           | 5.0895               | 3.2621                 | Hydrocarbons     | Pyrazine, 3,5-dimethyl-2-propyl-                                                              | 44.4327              | 0.2634                 | Pyrazines               |
| Acetone                                                           | 6.3956               | 1.2747                 | Ketones          | 2-Isoamyl-6-methylpyrazine                                                                    | 44.9965              | 0.1323                 | Pyrazines               |
| Cyclotrisiloxane, hexamethyl-                                     | 7.4366               | 1.6261                 | Other compounds  | Pyrazine, 2-methyl-5-propyl-                                                                  | 45.2461              | 0.1398                 | Pyrazines               |
| Butanal                                                           | 7.8132               | 0.5795                 | Aldehydes        | Benzeneacetaldehyde                                                                           | 45.7213              | 0.5201                 | Aldehydes               |
| (3-Methyl-oxiran-2-yl)-methanol                                   | 8.2514               | 0.2956                 | Alcohols         | 2-Acetylthiazole                                                                              | 45.9054              | 0.307                  | Tioles                  |
| 2-Butanone                                                        | 8.5563               | 1.0136                 | Ketones          | Acetophenone                                                                                  | 46.0589              | 0.2813                 | Ketones                 |
| Butanal, 2-methyl-                                                | 9.0824               | 0.3761                 | Aldehydes        | N-(2-Acetylcyclohexylidene)cyclohexylamine                                                    | 46.2014              | 0.0829                 | Other compounds         |
| Butanal, 3-methyl-                                                | 9.2754               | 1.5231                 | Aldehydes        | 2-Furanmethanol                                                                               | 46.3717              | 0.6816                 | Alcohols                |
| Isopropyl Alcohol                                                 | 9.6344               | 7.9273                 | Alcohols         | Pyrazine, 2,5-dimethyl-3-(3-methylbutyl)-                                                     | 46.7182              | 1.5359                 | Pyrazines               |
| Ethanol                                                           | 9.8968               | 5.2798                 | Alcohols         | Butanoic acid                                                                                 | 47.1192              | 0.1874                 | Acids                   |
| 2-Pentanone                                                       | 12.0822              | 0.0405                 | Ketones          | Propanedinitrile, (ethoxymethylene)-                                                          | 47.7582              | 0.108                  | Other compounds         |
| n-Propyl acetate                                                  | 12.1995              | 0.0314                 | Esters           | Benzoic acid, 4-methyl-                                                                       | 48.7692              | 0.0674                 | Acids                   |
| 2,3-Butanedione                                                   | 12.5333              | 0.6946                 | Ketones          | 1-Propanol, 3-(methylthio)-                                                                   | 49.061               | 0.1723                 | Alcohols                |
| Trichloroethylene                                                 | 13.0685              | 0.3244                 | Halocarbons      | Butanoic acid, 3-methyl-                                                                      | 49.4532              | 0.0662                 | Acids                   |
| Acetonitrile                                                      | 13.6221              | 0.0406                 | Other compounds  | 2-Furanmethanol, 5-methyl-                                                                    | 49.5847              | 0.0807                 | Alcohols                |
| Methyl Isobutyl Ketone                                            | 13.7437              | 0.0564                 | Ketones          | Tetradecanal                                                                                  | 50.0238              | 0.3508                 | Aldehydes               |
| Cyclotetrasiloxane, octamethyl-                                   | 14.3047              | 1.5744                 | Other compounds  | Acetamide                                                                                     | 50.7548              | 0.0706                 | Amidas                  |
| Trichloromethane                                                  | 14.8041              | 0.2079                 | Other compounds  | Benzene, 1,3-dimethoxy-                                                                       | 51.6009              | 0.0863                 | Esters                  |
| 2-1-Phenyl ethylidene-hydrazono-3-methyl-2,3-dihydrobenzothiazole | 15.0525              | 0.216                  | Other compounds  | 1-Decanol                                                                                     | 52.5638              | 1.9182                 | Alcohols                |
| Toluene                                                           | 15.4514              | 0.2354                 | Hydrocarbons     | Acetamide, N,N-dibutyl-                                                                       | 54.253               | 0.0595                 | Amidas                  |
| Dodecane                                                          | 16.1144              | 0.0359                 | Hydrocarbons     | 10-Undecen-1-ol                                                                               | 56.403               | 0.2586                 | Alcohols                |
| Disulfide, dimethyl S-                                            | 17.1678              | 1.1384                 | Other compounds  | 2-Tridecanone                                                                                 | 56.8746              | 0.3131                 | Ketones                 |
| (Isobutoxythiocarbon yl)thiohydroxylamine                         | 17.7703              | 0.0724                 | Other compounds  | Naphthalene, decahydro-, cis-                                                                 | 58.0396              | 0.5871                 | Hydrocarbons            |
| Hexanal                                                           | 18.1055              | 0.0836                 | Aldehydes        | Furan, 3-phenyl-                                                                              | 59.1475              | 0.1969                 | Other compounds         |
| Acetamide, N-2-propynyl-                                          | 18.3532              | 0.0765                 | Other compounds  | Benzyl alcohol                                                                                | 60.9237              | 0.2226                 | Alcohols                |
| 2-Butenal, 2-methyl-                                              | 18.6806              | 0.1793                 | Other compounds  | Butanoic acid, butyl ester                                                                    | 61.6643              | 0.3129                 | Esters                  |
| Ethylbenzene                                                      | 20.325               | 0.0762                 | Hydrocarbons     | Propanoic acid, 2-methyl-, 2-methylpropyl ester                                               | 62.9301              | 0.1483                 | Esters                  |
| p-Xylene                                                          | 20.779               | 0.1378                 | Hydrocarbons     | 5-Methylhexanoic acid                                                                         | 63.578               | 0.2454                 | Acids                   |
| 3-Penten-2-one, 4-methyl-                                         | 21.0413              | 0.0793                 | Ketones          | Methoxycarbonyl methoxythioxomethyl disulfide                                                 | 64.0157              | 0.0527                 | Other compounds         |
| Benzene, 1,3-dimethyl-                                            | 21.2047              | 0.1547                 | Other compounds  | Phenylethyl Alcohol                                                                           | 64.4037              | 0.143                  | Other compounds         |
| 1-Butanol                                                         | 21.9719              | 0.5005                 | Alcohols         | Benzonitrile, 2-methyl-                                                                       | 65.897               | 0.0309                 | Other compounds         |
| 3-Heptanone, 2-methyl-                                            | 22.6077              | 0.0286                 | Ketones          | Benzene, (1-pentylheptyl)-                                                                    | 66.5935              | 0.1485                 | Esters                  |
| Boron, trihydro(pyridine)-, (T-4)-                                | 23.4265              | 0.0469                 | Other compounds  | 2-Butanone, 1-chloro-3,3-dimethyl-                                                            | 67.3667              | 0.0547                 | Ketones                 |



|                                       |         |         |                         |                                                                             |         |        |                         |
|---------------------------------------|---------|---------|-------------------------|-----------------------------------------------------------------------------|---------|--------|-------------------------|
| Cyclopentasiloxane, decamethyl-       | 23.8904 | 1.2733  | Organosilicos compounds | 2,5-Piperazinedione, 3-methyl-                                              | 69.0691 | 0.041  | Other compounds         |
| 2-Butenal, 3-methyl-                  | 24.7753 | 0.046   | Aldehydes               | Ethanone, 1-(1H-pyrrol-2-yl)-                                               | 69.3625 | 0.0305 | Ketones                 |
| D-Limonene                            | 25.1624 | 0.0447  | Other compounds         | Cyclododecane                                                               | 70.5381 | 7.014  | Other compounds         |
| 1-Butanol, 3-methyl-                  | 25.4302 | 3.0905  | Alcohols                | 3-[5-(Chloromethyl)-1,2,4-oxadiazol-3-yl]-4-nitro-1,2,5-oxadiazole          | 71.5533 | 0.0482 | Oxadiazoles             |
| Benzene, 1-isothiocyanato-4-methyl-   | 25.7529 | 0.0224  | Other compounds         | 2-Pyrrolidinone                                                             | 71.8419 | 0.0555 | Pyrrolidinones          |
| Thiazole                              | 27.3075 | 0.0532  | Tioles                  | Phenol                                                                      | 72.0613 | 0.1484 | Other compounds         |
| l-Phenylalanine, methyl ester         | 27.4226 | 0.0279  | Esters                  | 1,2,3,4-Tetrahydrofluorene                                                  | 72.3295 | 0.0297 | Tetrahydrofluorenes     |
| 1,3,5,7-Cyclooctatetraene             | 27.9687 | 0.0571  | Other compounds         | Heptanoic acid                                                              | 72.7211 | 0.1349 | Other compounds         |
| Pyrazine, methyl-                     | 28.2136 | 1.5754  | Pyrazines               | Bicyclo[4.1.0]heptane, 2-methyl-                                            | 72.8892 | 0.1597 | Ketones                 |
| Silanediol, dimethyl-, diacetate      | 28.8063 | 0.012   | Other compounds         | Cyclodecasiloxane, eicosamethyl-                                            | 73.2191 | 0.1941 | Organosilicos compounds |
| 2-fluoro-1-phenylethanone             | 29.3166 | 0.0483  | Ketones                 | 9-Dodecen-1-ol, acetate, (Z)-                                               | 73.934  | 0.213  | Acids                   |
| Acetoin                               | 29.6334 | 5.4583  | Ketones                 | 2-Nonadecanone                                                              | 74.3816 | 0.1106 | Ketones                 |
| Octanal                               | 30.0745 | 0.1251  | Aldehydes               | Z-(13,14-Epoxy)tetradec-11-en-1-ol acetate                                  | 75.704  | 0.2352 | Other compounds         |
| 2-Propanone, 1-hydroxy-               | 30.3204 | 0.2289  | Ketones                 | 5-Methyl-2-phenyl-2-hexenal                                                 | 76.2341 | 0.1513 | Other compounds         |
| Pyrazine, 2,5-dimethyl-               | 31.1206 | 12.5776 | Pyrazines               | Phenol, 3-methyl-                                                           | 76.5431 | 0.0353 | Aromatic compounds      |
| Pyrazine, 2,6-dimethyl-               | 31.4411 | 0.6237  | Pyrazines               | Tris(dimethylamino)borane                                                   | 76.7715 | 0.0155 | Other compounds         |
| Pyrazine, ethyl-                      | 31.786  | 0.1253  | Pyrazines               | Glycerol 1,2-diacetate                                                      | 76.9813 | 0.0116 | Other compounds         |
| Cyclohexasiloxane, dodecamethyl-      | 32.2545 | 0.5663  | Organosilicos compounds | N-(6-Methoxy-1,3-benzothiazol-2-yl)acetamide                                | 78.3256 | 0.0248 | Amidas                  |
| Heptanoic acid, ethyl ester           | 32.572  | 0.0804  | Esters                  | Octanoic acid                                                               | 78.7092 | 0.8449 | Acids                   |
| Formic acid, hexyl ester              | 32.8456 | 0.1912  | Esters                  | 2-Trichloroacetylpyrrolidine                                                | 79.3402 | 0.0322 | Other compounds         |
| Hexane, 1,2,3-trimethoxy-             | 33.2567 | 0.0188  | Hydrocarbons            | 2(3H)-Furanone, 5-heptyldihydro-                                            | 79.5124 | 0.0346 | Other compounds         |
| 2-Pentanone, 4-hydroxy-4-methyl-      | 33.3481 | 0.0276  | Ketones                 | 4-[4-(2-Hydroxybenzoyl)amino]anilino]-4-oxobut-2-enoic acid                 | 79.7864 | 0.0477 | Other compounds         |
| Dimethyl trisulfide                   | 34.0029 | 0.2624  | Other compounds         | Cyclodecasiloxane, eicosamethyl-                                            | 80.5595 | 0.0802 | Organosilicos compounds |
| Pyrazine, 2-ethyl-6-methyl-           | 34.3283 | 0.1344  | Pyrazines               | 2H-Pyran-2-one, 6-pentyl-                                                   | 80.9195 | 0.0519 | Ketones                 |
| Pyrazine, 2-ethyl-5-methyl-           | 34.6025 | 1.0039  | Pyrazines               | 4,7-Methano-1H-indene, octahydro-, (3a.alpha.,4.alpha.,7.alpha.,7a.alpha.)- | 81.0509 | 0.019  | Hydrocarbons            |
| 2-Nonanone                            | 34.9697 | 0.8794  | Ketones                 | Cyclohexene, 3-(2-methylpropoxy)-                                           | 81.4896 | 0.1175 | Hydrocarbons            |
| Pyrazine, trimethyl-                  | 35.1229 | 1.5173  | Pyrazines               | Cyclopentadecane                                                            | 82.0705 | 0.2891 | Ketones                 |
| Pyrazine, 2-methyl-5-(1-methylethyl)- | 35.6756 | 0.2632  | Pyrazines               | Ethanone, 1-(2-aminophenyl)-                                                | 82.49   | 0.0432 | Ketones                 |
| Benzenamine, 4-(2H-tetrazol-2-yl)-    | 36.665  | 0.064   | Other compounds         | 2'-Amino-4'-methoxyacetanilide                                              | 82.757  | 0.0294 | Aromatic compounds      |
| Isopropyl phosphine                   | 36.8612 | 0.0301  | Other compounds         | Cyclododecene                                                               | 83.2184 | 0.209  | Hydrocarbons            |
| Pyrazine, 3-ethyl-2,5-dimethyl-       | 37.1609 | 2.0661  | Pyrazines               | Methyl anthranilate                                                         | 83.5151 | 2.1134 | Esters                  |
| Octanoic acid, ethyl ester            | 37.3431 | 0.2251  | Esters                  | 6-Nitro-o-tolunitrile                                                       | 84.6024 | 0.0112 | Other compounds         |
| Butanoic acid, 4-butoxy-              | 37.4209 | 0.2527  | Acids                   | Propanamide, N-(3-methoxyphenyl)-2,2-dimethyl-                              | 84.665  | 0.008  | Other compounds         |
| 1-Heptanol                            | 37.6157 | 0.114   | Alcohols                | 7-Methyl-5-thiophen-2-yl-1,3-dihydro-thieno[2,3-E]-[1,4]diazepin-2-one      | 85.2132 | 0.0307 | Other compounds         |
| Pyrazine, 2,6-diethyl-                | 37.889  | 0.112   | Pyrazines               | Sorbic Acid                                                                 | 85.4571 | 0.1489 | Acids                   |
| Furfural                              | 38.0053 | 0.1167  | Other compounds         | Cyclopentaneacetic acid, 3-oxo-2-pentyl-, methyl ester                      | 85.7837 | 0.0727 | Esters                  |
| Pyrazine, tetramethyl-                | 38.4023 | 0.045   | Pyrazines               | Tetracosamethyl-cyclododecasiloxane                                         | 85.888  | 0.1263 | Organosilicos compounds |
| 4-Heptanol, 2,6-dimethyl-             | 38.5891 | 0.1988  | Alcohols                | Azelaic dihydrazide                                                         | 86.484  | 0.1283 | Other compounds         |

|                                                                     |         |        |                         |                                                                |         |        |                         |
|---------------------------------------------------------------------|---------|--------|-------------------------|----------------------------------------------------------------|---------|--------|-------------------------|
| Acetic acid                                                         | 38.7375 | 0.261  | Acids                   | Succinic acid, but-3-yn-2-yl 2-methoxy-5-methylphenyl ester    | 86.672  | 0.0521 | Esters                  |
| Pyrazine, 2-ethenyl-6-methyl-                                       | 39.0186 | 0.247  | Pyrazines               | 2,4-Di-tert-butylphenol                                        | 87.0107 | 0.6439 | Aromatic compounds      |
| 1-Hexanol, 2-ethyl-                                                 | 39.2334 | 0.6505 | Alcohols                | n-Decanoic acid                                                | 88.1517 | 0.469  | Acids                   |
| Cycloheptasiloxane, tetradecamethyl-                                | 39.5082 | 0.4309 | Organosilicos compounds | Diethyl Phthalate                                              | 88.8248 | 0.0454 | Other compounds         |
| Ethanone, 1-(2-furanyl)-                                            | 39.813  | 0.0901 | Ketones                 | 4-Pyridinecarbonitrile, 1-oxide                                | 89.4087 | 0.0401 | Heterocyclic compounds  |
| (Z)-Tetradec-11-en-1-yl 2,2,2-trifluoroacetate                      | 40.0622 | 0.1277 | Acids                   | Hexestrol                                                      | 90.3676 | 0.0223 | Other compounds         |
| Acridine, 9-methyl-                                                 | 40.2084 | 0.2833 | Other compounds         | Cyclooctasiloxane, hexadecamethyl-                             | 91.1672 | 0.0207 | Organosilicos compounds |
| Benzaldehyde                                                        | 40.5983 | 0.7643 | Aldehydes               | Homosalate                                                     | 92.7891 | 0.0366 | Other compounds         |
| 2-[(Trimethylsilyl)oxy]-2-[4-[(trimethylsilyl)oxy]phenyl]ethanamine | 40.924  | 0.4142 | Other compounds         | Quinoline, 4-ethyl-                                            | 93.0055 | 0.0256 | Other compounds         |
| Pyrazine, 2-methyl-6-(1-propenyl)-, (E)-                            | 41.2435 | 0.4803 | Pyrazines               | Benzamide, 2,4,6-trinitro-N,N-dimethyl-                        | 93.6421 | 0.003  | Amidas                  |
| Cyclohexanol, 3,3,5-trimethyl-, cis-                                | 41.4724 | 0.06   | Alcohols                | 3,5-di-tert-Butyl-4-hydroxybenzaldehyde                        | 93.8697 | 0.014  | Aldehydes               |
| 1-Octanol                                                           | 42.0788 | 1.2641 | Alcohols                | 4,6-Dichloro-5-cyanopyrimidine                                 | 95.2412 | 0.0692 | Heterocyclic compounds  |
| 2-Thiaoctane, 4-(9-borabicyclo[3.3.1]non-9-yloxy)-                  | 42.3112 | 0.0639 | Other compounds         | Serratinine, 8-acetate                                         | 95.6338 | 0.0174 | Other compounds         |
| 2,3-Butanediol, [R-(R*,R*)]-                                        | 42.5427 | 1.3455 | Other compounds         | n-Hexadecanoic acid                                            | 95.9707 | 0.0098 | Acids                   |
|                                                                     |         |        |                         | 3a-(2-Oxocyclohexyl)-dihydrofuro[3,4-c]pyrrole-1,3,4,6-tetrone | 96.8341 | 0.0133 | Other compounds         |

**Table S4.** Identification of COVs produced by *K. cowanii* Cp1 at 6 h p1 by HS-SPME-GC-MS.

| Compounds                                               | Retention Time (min) | Relative Peak Area (%) | Chemical Classes    | Compounds                                                               | Retention Time (min) | Relative Peak Area (%) | Chemical Classes |
|---------------------------------------------------------|----------------------|------------------------|---------------------|-------------------------------------------------------------------------|----------------------|------------------------|------------------|
| Carbon dioxide                                          | 4.2148               | 1.5834                 | Hydrocarbons        | Benzaldehyde                                                            | 40.5945              | 1.0877                 | Aldehydes        |
| Pentane                                                 | 4.355                | 0.3694                 | Hydrocarbons        | 4-Trimethylsilyl-9,9-dimethyl-9-silafluorene                            | 40.9261              | 0.3662                 | Other compounds  |
| 5-Isoxazolepropanamine, N-methyl-3-(4-nitrophenyl)-     | 4.4769               | 0.4825                 | Other compounds     | Benzaldehyde, 2,4-dimethyl-                                             | 41.2367              | 0.3122                 | Aldehydes        |
| n-Hexane                                                | 4.5814               | 0.2042                 | Other compounds     | Cyclohexanol, 3,3,5-trimethyl-                                          | 41.4746              | 0.0694                 | Alcohols         |
| Ethyl ether                                             | 4.6383               | 0.7497                 | Ethers              | 1-Octanol                                                               | 42.0854              | 0.8553                 | Alcohols         |
| Propane, 2-methoxy-2-methyl-                            | 4.9493               | 0.5467                 | Other compounds     | 14-Methylpentadec-9-enoic acid methyl ester                             | 42.3522              | 0.0602                 | Esters           |
| Heptane                                                 | 5.0886               | 2.7363                 | Hydrocarbons        | 2,3-Butanediol                                                          | 42.5605              | 4.1653                 | Other compounds  |
| Acetone                                                 | 6.3904               | 1.3664                 | Ketones             | Quinoline, 4-(4-chlorophenoxy)-8-fluoro-2-trifluoromethyl-              | 42.9027              | 1.1333                 | Other compounds  |
| Cyclotrisiloxane, hexamethyl-                           | 7.4238               | 1.241                  | Other compounds     | Phosphonoacetic Acid, 3TMS derivative                                   | 43.5433              | 0.2773                 | Acids            |
| Butanal                                                 | 7.8062               | 0.5058                 | Aldehydes           | 2-Undecanone                                                            | 44.2501              | 0.285                  | Ketones          |
| Ethyl Acetate                                           | 8.2457               | 0.3688                 | Ácidos carboxílicos | 2-Amino-2-oxo-acetic acid, N-[3,4-dimethylphenyl]-, ethyl ester         | 44.3732              | 0.0927                 | Esters           |
| 2-Butanone                                              | 8.5454               | 1.4304                 | Ketones             | Diethyl carbitol                                                        | 44.5221              | 0.2403                 | Other compounds  |
| Butanal, 2-methyl-                                      | 9.0651               | 0.343                  | Aldehydes           | Butyrolactone                                                           | 44.9055              | 0.2206                 | Other compounds  |
| Butanal, 3-methyl-                                      | 9.2572               | 1.5338                 | Aldehydes           | Benzeneacetaldehyde                                                     | 45.7205              | 0.2205                 | Aldehydes        |
| Ethanol, 2-methoxy-, carbonate (2:1)                    | 9.5915               | 0.1549                 | Alcohols            | 2-Acetylthiazole                                                        | 45.9046              | 0.1579                 | Tioles           |
| Ethanol                                                 | 9.9087               | 7.5719                 | Alcohols            | Acetophenone                                                            | 46.055               | 0.2117                 | Ketones          |
| 2-Butanone, 3-methyl-                                   | 12.0638              | 0.0199                 | Ketones             | 2-Furanmethanol                                                         | 46.3652              | 0.578                  | Alcohols         |
| 2,3-Butanedione                                         | 12.5144              | 2.0864                 | Ketones             | Pyrazine, 2,5-dimethyl-3-(3-methylbutyl)-                               | 46.746               | 0.6693                 | Pyrazines        |
| Trichloroethylene                                       | 13.0492              | 0.5284                 | Other compounds     | Benzoic acid, 2-formyl-                                                 | 47.097               | 0.2009                 | Acids            |
| Methyl isocyanide                                       | 13.5895              | 0.0562                 | Other compounds     | Benzaldehyde, 2-hydroxy-                                                | 47.7644              | 0.1597                 | Aldehydes        |
| Cyclotetrasiloxane, octamethyl-                         | 14.2547              | 1.0141                 | Other compounds     | .alpha.-D-Galactopyranoside, methyl                                     | 49.0932              | 0.4892                 | Other compounds  |
| Trichloromethane                                        | 14.7774              | 0.2041                 | Other compounds     | N-Isobutyl-11-(3,4-methylenedioxyphenyl)-2E,4E,10E-undecatrienoic amide | 49.5524              | 0.0899                 | Other compounds  |
| 2-Oxo-4-phenyl-6-(4-chlorophenyl)-1,2-dihydropyrimidine | 14.9662              | 0.1407                 | Other compounds     | 5-[2-(Dimethoxyphosphonyl)acetoxy]hex-2-enoic acid                      | 50.0029              | 0.131                  | Acids            |
| Toluene                                                 | 15.4417              | 0.245                  | Hydrocarbons        | Acetamide                                                               | 50.7633              | 0.0948                 | Other compounds  |
| Butanoic acid, ethyl ester                              | 15.694               | 0.1706                 | Esters              | 1,4-Benzenediol, 2,5-dimethyl-                                          | 51.6031              | 0.059                  | Alcohols         |
| Disulfide, dimethyl                                     | 17.1472              | 0.6794                 | Other compounds     | Cystine                                                                 | 51.8276              | 0.0424                 | Other compounds  |
| Acetic acid, butyl ester                                | 17.751               | 0.1166                 | Esters              | 1-Decanol                                                               | 52.5799              | 1.7302                 | Alcohols         |
| Hexanal                                                 | 18.0959              | 0.1403                 | Aldehydes           | Methyl salicylate                                                       | 53.5142              | 0.0372                 | Esters           |
| (S)-(-)-1,2,4-Butanetriol, 4-trifluoroacetate           | 18.3342              | 0.151                  | Alcohols            | 9-Decen-1-ol                                                            | 56.413               | 0.2841                 | Alcohols         |
| 2-Butenal, 2-methyl-                                    | 18.6643              | 0.1576                 | Other compounds     | 2-Hexanone, 4-methyl-                                                   | 56.8369              | 0.0577                 | Ketones          |
| 1-Propanol, 2-methyl-                                   | 19.3076              | 0.0609                 | Alcohols            | 1H-Indenol                                                              | 57.1242              | 0.0466                 | Other compounds  |
| Ethylbenzene                                            | 20.3083              | 0.059                  | Other compounds     | 9-Decen-1-yl acetate                                                    | 58.0169              | 0.048                  | Esters           |
| 3-Methylheptyl acetate                                  | 20.7453              | 0.2274                 | Other compounds     | Cyclononasiloxane, octadecamethyl-                                      | 58.1858              | 0.1251                 | Other compounds  |
| Diethyl phosphite                                       | 21.0175              | 0.025                  | Other compounds     | 1-Naphthalenol                                                          | 59.141               | 0.0381                 | Alcohols         |
| o-Xylene                                                | 21.2181              | 0.1476                 | Hydrocarbons        | Benzyl alcohol                                                          | 60.9297              | 0.5091                 | Alcohols         |

|                                                                      |         |        |                 |                                                            |         |         |                    |
|----------------------------------------------------------------------|---------|--------|-----------------|------------------------------------------------------------|---------|---------|--------------------|
| Pentanoic acid, ethyl ester                                          | 21.4566 | 0.2803 | Esters          | Butanoic acid, butyl ester                                 | 61.6643 | 0.1711  | Esters             |
| 1-Butanol                                                            | 21.9567 | 1.6217 | Alcohols        | Propanoic acid, 2-methyl-, hexyl ester                     | 62.9285 | 0.0838  | Esters             |
| Pyridine                                                             | 23.5129 | 0.0235 | Other compounds | .alpha.-d-Ribopyranoside, methyl                           | 63.4589 | 0.3882  | Other compounds    |
| Cyclopentasiloxane, decamethyl-                                      | 23.866  | 0.79   | Other compounds | Acetic acid, dichloro-, methyl ester                       | 64.0105 | 0.1088  | Esters             |
| p-Xylene                                                             | 24.3024 | 0.1304 | Hydrocarbons    | Phenylethyl Alcohol                                        | 64.413  | 0.1258  | Alcohols           |
| D-Limonene                                                           | 25.1621 | 0.5267 | Other compounds | 2,2-Dimethyl-3-heptanone                                   | 67.3475 | 0.068   | Ketones            |
| 1-Butanol, 3-methyl-                                                 | 25.4166 | 4.9428 | Alcohols        | Ethyl 2-chloro-3,3,3-trifluoro-2-isovaleramidopropionate   | 69.0587 | 0.073   | Other compounds    |
| Thiazole                                                             | 27.3043 | 0.076  | Tioles          | Ethanone, 1-(1H-pyrrol-2-yl)-                              | 69.3391 | 0.0246  | Ketones            |
| 3-Buten-1-ol, 3-methyl-                                              | 27.5937 | 0.047  | Alcohols        | Cyclododecane                                              | 70.5476 | 2.7441  | Hydrocarbons       |
| 1,3,5,7-Cyclooctatetraene                                            | 27.9557 | 0.0623 | Other compounds | Acetamide, 2-(4-methoxyphenyl)-N-isobutyl-                 | 71.2623 | 0.0273  | Other compounds    |
| Pyrazine, methyl-                                                    | 28.2139 | 1.3549 | Pyrazines       | 2-Pyrrolidinone                                            | 71.8334 | 0.0351  | Other compounds    |
| Benzene, 4-ethyl-1,2-dimethyl-                                       | 29.1222 | 0.1246 | Other compounds | Phenol                                                     | 72.0354 | 0.0348  | Aromatic compounds |
| N-[3-Isopropyl-1,2,4]triazolo[3,4-b][1,3,4]thiadiazol-6-yl]benzamide | 29.2902 | 0.064  | Other compounds | Phenol, O-(ethylsulfinyl)-                                 | 72.3273 | 0.0861  | Aromatic compounds |
| Acetoin                                                              | 29.6282 | 6.0438 | Ketones         | Heptanoic acid                                             | 72.8902 | 0.1672  | Acids              |
| Octanal                                                              | 30.0686 | 0.0886 | Aldehydes       | Cyclodecasiloxane, eicosamethyl-                           | 73.1743 | 0.1781  | Other compounds    |
| 2-Propanone, 1-hydroxy-                                              | 30.3109 | 0.3178 | Hydrocarbons    | 10-Undecen-1-ol                                            | 73.9515 | 0.1347  | Alcohols           |
| Pyrazine, 2,5-dimethyl-                                              | 31.1047 | 9.1536 | Pyrazines       | 4,6-Dichloro-5-cyanopyrimidine                             | 76.152  | 12.2595 | Other compounds    |
| Pyrazine, 2,6-dimethyl-                                              | 31.4365 | 0.4572 | Pyrazines       | 1,1'-Biphenyl, 3-methyl-                                   | 76.9681 | 0.0315  | Other compounds    |
| Pyrazine, ethyl-                                                     | 31.7829 | 0.1468 | Pyrazines       | 2,6-Bis(1,1-dimethylethyl)-4-(1-oxopropyl)phenol           | 78.1584 | 0.0972  | Other compounds    |
| Cyclohexasiloxane, dodecamethyl-                                     | 32.2415 | 0.3424 | Other compounds | 3-(tert-Butyl)-4-methoxyphenyl acetate                     | 78.2989 | 0.0506  | Other compounds    |
| Methyl 2,5,8,11-tetraoxatridecan-13-oate                             | 32.4655 | 0.027  | Other compounds | Octanoic acid                                              | 78.5868 | 1.2376  | Acids              |
| 1-Hexanol                                                            | 32.8437 | 0.146  | Alcohols        | Benzenamine, 2,5-dimethyl-                                 | 79.7828 | 0.0874  | Other compounds    |
| Fumaric Acid                                                         | 33.2526 | 0.0469 | Acids           | Cyclooctasiloxane, hexadecamethyl-                         | 80.5348 | 0.0498  | Other compounds    |
| Dimethyl trisulfide                                                  | 33.9942 | 0.0942 | Other compounds | 1H-Pyrazole, 3-methyl-                                     | 81.346  | 0.0324  | Other compounds    |
| Undecanoic acid, 2,4,6-trimethyl-, methyl ester                      | 34.3096 | 0.1454 | Esters          | 7-Hexadecene, (Z)-                                         | 81.8691 | 0.0937  | Other compounds    |
| Pyrazine, 2-ethyl-6-methyl-                                          | 34.6082 | 0.5342 | Pyrazines       | Cyclononasiloxane, octadecamethyl-                         | 82.2844 | 0.0924  | Other compounds    |
| 2-Nonanone                                                           | 34.9646 | 0.2318 | Ketones         | 4-Butoxycarbonyl-4'-formylaminoazobenzene                  | 82.4921 | 0.1365  | Other compounds    |
| Pyrazine, trimethyl-                                                 | 35.1289 | 0.8557 | Pyrazines       | 2,5-Bis(5-tert-butyl-2-benzoxazolyl)thiophene              | 82.725  | 0.0567  | Other compounds    |
| Pyrazine, 2-methyl-5-(1-methylethyl)-                                | 35.676  | 0.1808 | Pyrazines       | 1,7-Hexadecadiene                                          | 83.0452 | 0.2306  | Other compounds    |
| Isonicotinamide, N,N-didecyl-                                        | 36.6483 | 0.0586 | Other compounds | Nonanoic acid                                              | 83.4135 | 2.3664  | Acids              |
| Pyrazine, 3-ethyl-2,5-dimethyl-                                      | 37.1587 | 1.1049 | Pyrazines       | Oxazepam, 2TMS derivative                                  | 85.8652 | 0.103   | Other compounds    |
| Methional                                                            | 37.5356 | 0.0646 | Other compounds | Ethanone, 1-(4,5-dihydro-2-thiazolyl)-                     | 86.5769 | 0.1361  | Ketones            |
| Formic acid, heptyl ester                                            | 37.6136 | 0.0678 | Esters          | 2,4-Di-tert-butylphenol                                    | 87.0063 | 0.1254  | Aromatic compounds |
| Acetic acid                                                          | 37.9195 | 0.4931 | Acids           | 1(2H)-Naphthalenone, 3,4-dihydro-2-(phenylmethylene)-      | 87.447  | 0.0976  | Other compounds    |
| 3-Furaldehyde                                                        | 37.9922 | 2.0136 | Aldehydes       | n-Decanoic acid                                            | 88.1729 | 0.6736  | Acids              |
| 4-Heptanol, 2,6-dimethyl-                                            | 38.5802 | 0.7236 | Alcohols        | Diethyl Phthalate                                          | 88.8125 | 0.0642  | Other compounds    |
| 1-Hexanol, 2-ethyl-                                                  | 39.2427 | 0.531  | Alcohols        | 2-Oxadamantane-1-carboxamide, N-(1-phenylethyl)-           | 89.3863 | 0.0659  | Other compounds    |
| Cycloheptasiloxane, tetradecamethyl-                                 | 39.496  | 0.3015 | Other compounds | Benzenesulfonamide, N-(adamantan-1-yl)methyl-4-tert-butyl- | 90.3503 | 0.019   | Other compounds    |

|                             |         |        |                 |                                                                               |         |        |                 |
|-----------------------------|---------|--------|-----------------|-------------------------------------------------------------------------------|---------|--------|-----------------|
| Ethanone, 1-(2-furanyl)-    | 39.8133 | 0.085  | Ketones         | Tetracosamethyl-cyclododecasiloxane                                           | 91.1365 | 0.0452 | Other compounds |
| 1H-Indene, octahydro-, cis- | 40.0534 | 0.092  | Other compounds | tert-Butyldimethylsilyl 3-chloro-5-methoxy-4-(2,2,2-trifluoroacetoxy)benzoate | 95.4524 | 0.041  | Other compounds |
| 2-Mercapto-4-phenylthiazole | 40.2064 | 0.3456 | Tioles          | Dodecanoic acid                                                               | 96.0639 | 0.0348 | Acids           |
|                             |         |        |                 | 2-Propanone, 1,1,3-trichloro-                                                 | 97.6867 | 0.0196 | Ketones         |

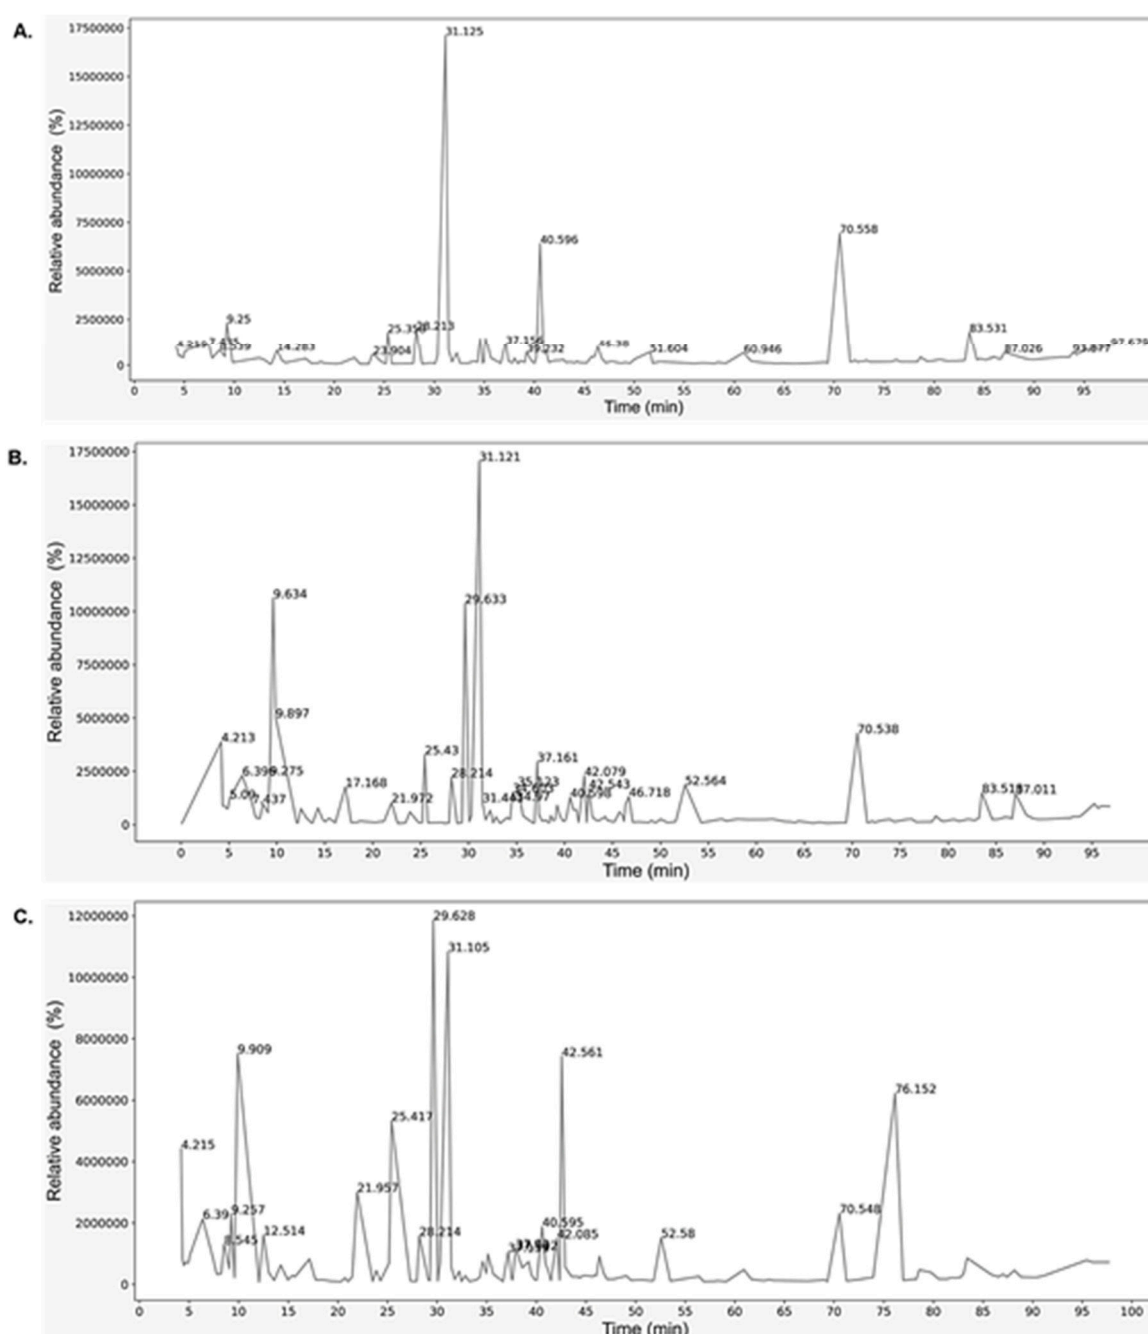

**Figure S5.** Detection of VOCs produced by *K. cowanii* Cp1. The main volatile organic compounds emitted by the *K. cowanii* Cp1 strain were identified during bacterial growth phases: 2 hours, 4 hours and 6 hours.

Among the main VOCs that were detected at 2 h were pyrazine, 2,5-dimethyl-, cyclododecane, benzaldehyde, methyl anthranilate, pyrazine, methyl-, pyrazine, Butanal, 3-methyl-, pyrazine, 2-ethyl-5-methyl-, pyrazine, 3-ethyl-2,5-dimethyl- and 1-Hexanol, 2-ethyl-. **B.** The VOCs identified at 4 h were pyrazine, 2,5-dimethyl-, isopropyl alcohol, acetoin, cyclododecane, 1-Butanol, 3-methyl-, pyrazine, 3-ethyl-2,5-dimethyl-, 1-Octanol, pyrazine, methyl-, disulfide, dimethyl and 1-Butanol. **C.** Finally, the compounds that were produced at 6 h included acetoin, pyrazine, 2,5-dimethyl-, 2,3-Butanediol, ethanol, 4,6-Dichloro-5-cyanopyrimidine, 1-Butanol, 3-methyl-, 1-Butanol, cyclododecane, pyrazine, methyl- and benzaldehyde.
